# Supplementary material for: Implementation and Evaluation of an Educational Program for Increasing Diversity and Inclusion in Surgery for Preclinical Students
Source: PubMed Central journal article supplement (PMC7489849; doi:10.1001/jamanetworkopen.2020.15675), 2020-09-01
Supplement: jamanetwopen-e2015675-s001.pdf [file jamanetwopen-e2015675-s001.pdf]

## Supplementary Online Content

Bryant TS, Carroll AL, Steinberg JR, et al. Implementation and evaluation of an educational program for increasing diversity and inclusion in surgery for preclinical students. *JAMA Network Open*. 2020;3(9):e2015675. doi:10.1001/jamanetworkopen.2020.15675

**eFigure.** Course development timeline for “Service Through Surgery” including questions asked to surgeons, discussion topics presented in the course, and a sample of the end-of-course evaluation survey

This supplementary material has been provided by the authors to give readers additional information about their work.

# SERVICE THROUGH SURGERY

- Increasing diverse mentorship.
- Encouraging service and advocacy in surgical specialties.
- Exploring identity and specialty choice.

## TIMELINE

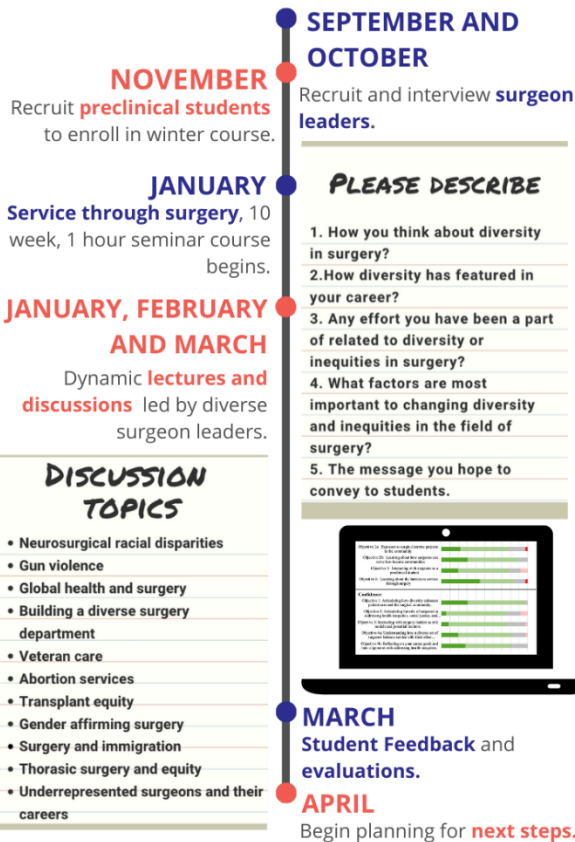

## EVALUATION

1. Please rank the effectiveness of the lecture-style presentations.
2. Please rank the effectiveness of the conversation-style presentations.
3. Did you reach out to any of the lecturers in person or via email for mentorship, a meeting or research following their lecture in Service Through Surgery?
4. Please rate the lineup of speakers and content of lectures in terms of:
  - a. racial and ethnic diversity.
  - b. Gender and Sexual Minority diversity.
5. What ideas do you have to increase the diversity of the speaker panel?
6. Please rate your agreement with the following:
  - a. I would recommend this class to other students.
  - b. Students should be required to take this class.
7. Please describe a moment in the class that was particularly memorable for you.
8. Please comment on:
  - a. how STS influenced your thoughts on how surgeons can be involved in the community.
  - b. How did this course influenced your thoughts on surgery as a career path?
9. What are some of the strengths of this class?
10. Please provide suggestions for improvement.

**eFigure.** Course development timeline for “Service Through Surgery” including questions asked to surgeons, discussion topics presented in the course, and a sample of the end-of-course evaluation survey.
